# Supplementary material
Source: publisher site journal article supplement (https://dez.pensoft.net/article/55732/download/suppl/39/)
Supplement: Supplementary file 1

**Appendix 9** Alignment of the self-obtained *COI* sequences showing distinguishing substitutions of the Austrian species of the *Colletes succinctus* group and outgroup taxa (*C. creticus*)

|                               |            |            |             |            |            |             |
|-------------------------------|------------|------------|-------------|------------|------------|-------------|
|                               | 10         | 20         | 30          | 40         | 50         | 60          |
| <i>C. hederæ</i> (P3)         | GAAC       | TGGAAT     | AATT        | GGTTCA     | TCTTTAAGAA | TAATTATTTCG |
| <i>C. hederæ</i> (BK1)        | GAAC       | TGGAAT     | AATT        | GGTTCA     | TCTTTAAGAA | TAATTATTTCG |
| <i>C. hederæ</i> (BK2)        | GAAC       | TGGAAT     | AATT        | GGTTCA     | TCTTTAAGAA | TAATTATTTCG |
| <i>C. succinctus</i> (BK3)    | GAAC       | TGGAAT     | AATT        | GGTTCA     | TCTTTAAGAA | TAATTATTTCG |
| <i>C. succinctus</i> (BK4)    | GAAC       | TGGAAT     | AATT        | GGTTCA     | TCTTTAAGAA | TAATTATTTCG |
| <i>C. succinctus</i> (BK5)    | GAAC       | TGGAAT     | AATT        | GGTTCA     | TCTTTAAGAA | TAATTATTTCG |
| <i>C. succinctus</i> (7346)   | GAAC       | TGGAAT     | AATT        | GGTTCA     | TCTTTAAGAA | TAATTATTTCG |
| <i>C. succinctus</i> (7345)   | GAAC       | TGGAAT     | AATT        | GGTTCA     | TCTTTAAGAA | TAATTATTTCG |
| <i>C. collaris</i> (BK6)      | GAAC       | TGGAAT     | AATT        | GGTTCA     | TCTTTAAGAA | TAATTATTTCG |
| <i>C. collaris</i> (BK7)      | GAAC       | TGGAAT     | AATT        | GGTTCA     | TCTTTAAGAA | TAATTATTTCG |
| <i>C. collaris</i> (BK8)      | GAAC       | TGGAAT     | AATT        | GGTTCA     | TCTTTAAGAA | TAATTATTTCG |
| <i>C. collaris</i> (BK9)      | GAAC       | TGGAAT     | AATT        | GGTTCA     | TCTTTAAGAA | TAATTATTTCG |
| <i>C. pannonicus</i> (BK25)   | GAAC       | TGGAAT     | AATT        | GGTTCA     | TCTTTAAGAA | TAATTATTTCG |
| <i>C. pannonicus</i> (BK26)   | GAAC       | TGGAAT     | AATT        | GGTTCA     | TCTTTAAGAA | TAATTATTTCG |
| <i>C. brevigena</i> (BK28)    | GAAC       | TGGAAT     | AATT        | GGTTCA     | TCTTTAAGAA | TAATTATTTCG |
| <i>C. brevigena</i> (BK23)    | GAAC       | TGGAAT     | AATT        | GGTTCA     | TCTTTAAGAA | TAATTATTTCG |
| <i>C. brevigena</i> (BK29)    | GAAC       | TGGAAT     | AATT        | GGTTCA     | TCTTTAAGAA | TAATTATTTCG |
| <i>C. brevigena</i> (BK30)    | GAAC       | TGGAAT     | AATT        | GGTTCA     | TCTTTAAGAA | TAATTATTTCG |
| <i>C. brevigena</i> CY (BK37) | GAAC       | TGGAAT     | AATT        | GGTTCA     | TCTTTAAGAA | TAATTATTTCG |
| <i>C. brevigena</i> TU (BK38) | GAAC       | TGGAAT     | AATT        | GGTTCA     | TCTTTAAGAA | TAATTATTTCG |
| <i>C. creticus</i> (7348)     | GAAC       | TGGAAT     | AATT        | GGTTCA     | TCTTTAAGAA | TAATTATTTCG |
|                               | 70         | 80         | 90          | 100        | 110        | 120         |
| <i>C. hederæ</i> (P3)         | GTATATGAAT | TAATAATGAT | CAAAATTTATA | ATTCTATTGT | TACAGCTCAT | GCTTTTATTA  |
| <i>C. hederæ</i> (BK1)        | GTATATGAAT | TAATAATGAT | CAAAATTTATA | ATTCTATTGT | TACAGCTCAT | GCTTTTATTA  |
| <i>C. hederæ</i> (BK2)        | GTATATGAAT | TAATAATGAT | CAAAATTTATA | ATTCTATTGT | TACAGCTCAT | GCTTTTATTA  |
| <i>C. succinctus</i> (BK3)    | GTATATGAAT | TAATAATGAT | CAAAATTTATA | ATTCTATTGT | TACAGCTCAT | GCTTTTATTA  |
| <i>C. succinctus</i> (BK4)    | GTATATGAAT | TAATAATGAT | CAAAATTTATA | ATTCTATTGT | TACAGCTCAT | GCTTTTATTA  |
| <i>C. succinctus</i> (BK5)    | GTATATGAAT | TAATAATGAT | CAAAATTTATA | ATTCTATTGT | TACAGCTCAT | GCTTTTATTA  |
| <i>C. succinctus</i> (7346)   | GTATATGAAT | TAATAATGAT | CAAAATTTATA | ATTCTATTGT | TACAGCTCAT | GCTTTTATTA  |
| <i>C. succinctus</i> (7345)   | GTATATGAAT | TAATAATGAT | CAAAATTTATA | ATTCTATTGT | TACAGCTCAT | GCTTTTATTA  |
| <i>C. collaris</i> (BK6)      | GTATATGAAT | TAATAATGAT | CAAAATTTATA | ATTCTATTGT | TACAGCTCAT | GCTTTTATTA  |
| <i>C. collaris</i> (BK7)      | GTATATGAAT | TAATAATGAT | CAAAATTTATA | ATTCTATTGT | TACAGCTCAT | GCTTTTATTA  |
| <i>C. collaris</i> (BK8)      | GTATATGAAT | TAATAATGAT | CAAAATTTATA | ATTCTATTGT | TACAGCTCAT | GCTTTTATTA  |
| <i>C. collaris</i> (BK9)      | GTATATGAAT | TAATAATGAT | CAAAATTTATA | ATTCTATTGT | TACAGCTCAT | GCTTTTATTA  |
| <i>C. pannonicus</i> (BK25)   | GTATATGAAT | TAATAATGAT | CAAAATTTATA | ATTCTATTGT | TACAGCTCAT | GCTTTTATTA  |
| <i>C. pannonicus</i> (BK26)   | GTATATGAAT | TAATAATGAT | CAAAATTTATA | ATTCTATTGT | TACAGCTCAT | GCTTTTATTA  |
| <i>C. brevigena</i> (BK28)    | GTATATGAAT | TAATAATGAT | CAAAATTTATA | ATTCTATTGT | TACAGCTCAT | GCTTTTATTA  |
| <i>C. brevigena</i> (BK23)    | GTATATGAAT | TAATAATGAT | CAAAATTTATA | ATTCTATTGT | TACAGCTCAT | GCTTTTATTA  |
| <i>C. brevigena</i> (BK29)    | GTATATGAAT | TAATAATGAT | CAAAATTTATA | ATTCTATTGT | TACAGCTCAT | GCTTTTATTA  |
| <i>C. brevigena</i> (BK30)    | GTATATGAAT | TAATAATGAT | CAAAATTTATA | ATTCTATTGT | TACAGCTCAT | GCTTTTATTA  |
| <i>C. brevigena</i> CY (BK37) | GTATATGAAT | TAATAATGAT | CAAAATTTATA | ATTCTATTGT | TACAGCTCAT | GCTTTTATTA  |
| <i>C. brevigena</i> TU (BK38) | GTATATGAAT | TAATAATGAT | CAAAATTTATA | ATTCTATTGT | TACAGCTCAT | GCTTTTATTA  |
| <i>C. creticus</i> (7348)     | GTATATGAAT | TAATAATGAT | CAAAATTTATA | ATTCTATTGT | TACAGCTCAT | GCTTTTATTA  |
|                               | 130        | 140        | 150         | 160        | 170        | 180         |
| <i>C. hederæ</i> (P3)         | TAATTTTTTT | TATAGTAATA | CCTTTTTTAA  | TTGGTGGATT | TGGAAATTGA | TTAATTCAT   |
| <i>C. hederæ</i> (BK1)        | TAATTTTTTT | TATAGTAATA | CCTTTTTTAA  | TTGGTGGATT | TGGAAATTGA | TTAATTCAT   |
| <i>C. hederæ</i> (BK2)        | TAATTTTTTT | TATAGTAATA | CCTTTTTTAA  | TTGGTGGATT | TGGAAATTGA | TTAATTCAT   |
| <i>C. succinctus</i> (BK3)    | TAATTTTTTT | TATAGTAATA | CCTTTTTTAA  | TTGGTGGATT | TGGAAATTGA | TTAATTCAT   |
| <i>C. succinctus</i> (BK4)    | TAATTTTTTT | TATAGTAATA | CCTTTTTTAA  | TTGGTGGATT | TGGAAATTGA | TTAATTCAT   |
| <i>C. succinctus</i> (BK5)    | TAATTTTTTT | TATAGTAATA | CCTTTTTTAA  | TTGGTGGATT | TGGAAATTGA | TTAATTCAT   |
| <i>C. succinctus</i> (7346)   | TAATTTTTTT | TATAGTAATA | CCTTTTTTAA  | TTGGTGGATT | TGGAAATTGA | TTAATTCAT   |
| <i>C. succinctus</i> (7345)   | TAATTTTTTT | TATAGTAATA | CCTTTTTTAA  | TTGGTGGATT | TGGAAATTGA | TTAATTCAT   |
| <i>C. collaris</i> (BK6)      | TAATTTTTTT | TATAGTAATA | CCTTTTTTAA  | TTGGTGGATT | TGGAAATTGA | TTAATTCAT   |
| <i>C. collaris</i> (BK7)      | TAATTTTTTT | TATAGTAATA | CCTTTTTTAA  | TTGGTGGATT | TGGAAATTGA | TTAATTCAT   |
| <i>C. collaris</i> (BK8)      | TAATTTTTTT | TATAGTAATA | CCTTTTTTAA  | TTGGTGGATT | TGGAAATTGA | TTAATTCAT   |
| <i>C. collaris</i> (BK9)      | TAATTTTTTT | TATAGTAATA | CCTTTTTTAA  | TTGGTGGATT | TGGAAATTGA | TTAATTCAT   |
| <i>C. pannonicus</i> (BK25)   | TAATTTTTTT | TATAGTAATA | CCTTTTTTAA  | TTGGTGGATT | TGGAAATTGA | TTAATTCAT   |
| <i>C. pannonicus</i> (BK26)   | TAATTTTTTT | TATAGTAATA | CCTTTTTTAA  | TTGGTGGATT | TGGAAATTGA | TTAATTCAT   |
| <i>C. brevigena</i> (BK28)    | TAATTTTTTT | TATAGTAATA | CCTTTTTTAA  | TTGGTGGATT | TGGAAATTGA | TTAATTCAT   |
| <i>C. brevigena</i> (BK23)    | TAATTTTTTT | TATAGTAATA | CCTTTTTTAA  | TTGGTGGATT | TGGAAATTGA | TTAATTCAT   |
| <i>C. brevigena</i> (BK29)    | TAATTTTTTT | TATAGTAATA | CCTTTTTTAA  | TTGGTGGATT | TGGAAATTGA | TTAATTCAT   |
| <i>C. brevigena</i> (BK30)    | TAATTTTTTT | TATAGTAATA | CCTTTTTTAA  | TTGGTGGATT | TGGAAATTGA | TTAATTCAT   |
| <i>C. brevigena</i> CY (BK37) | TAATTTTTTT | TATAGTAATA | CCTTTTTTAA  | TTGGTGGATT | TGGAAATTGA | TTAATTCAT   |
| <i>C. brevigena</i> TU (BK38) | TAATTTTTTT | TATAGTAATA | CCTTTTTTAA  | TTGGTGGATT | TGGAAATTGA | TTAATTCAT   |
| <i>C. creticus</i> (7348)     | TAATTTTTTT | TATAGTAATA | CCTTTTTTAA  | TTGGTGGATT | TGGAAATTGA | TTAATTCAT   |
|                               | 190        | 200        | 210         | 220        | 230        | 240         |
| <i>C. hederæ</i> (P3)         | TAATATTAGG | AGCACCAGAT | ATAGCATTTG  | CTCGTATAAA | TAATATAAGA | TTTTGATTAT  |
| <i>C. hederæ</i> (BK1)        | TAATATTAGG | AGCACCAGAT | ATAGCATTTG  | CTCGTATAAA | TAATATAAGA | TTTTGATTAT  |
| <i>C. hederæ</i> (BK2)        | TAATATTAGG | AGCACCAGAT | ATAGCATTTG  | CTCGTATAAA | TAATATAAGA | TTTTGATTAT  |
| <i>C. succinctus</i> (BK3)    | TAATATTAGG | AGCACCAGAT | ATAGCATTTG  | CTCGTATAAA | TAATATAAGA | TTTTGATTAT  |
| <i>C. succinctus</i> (BK4)    | TAATATTAGG | AGCACCAGAT | ATAGCATTTG  | CTCGTATAAA | TAATATAAGA | TTTTGATTAT  |
| <i>C. succinctus</i> (BK5)    | TAATATTAGG | AGCACCAGAT | ATAGCATTTG  | CTCGTATAAA | TAATATAAGA | TTTTGATTAT  |
| <i>C. succinctus</i> (7346)   | TAATATTAGG | AGCACCAGAT | ATAGCATTTG  | CTCGTATAAA | TAATATAAGA | TTTTGATTAT  |
| <i>C. succinctus</i> (7345)   | TAATATTAGG | AGCACCAGAT | ATAGCATTTG  | CTCGTATAAA | TAATATAAGA | TTTTGATTAT  |
| <i>C. collaris</i> (BK6)      | TAATATTAGG | AGCACCAGAT | ATAGCATTTG  | CTCGTATAAA | TAATATAAGA | TTTTGATTAT  |
| <i>C. collaris</i> (BK7)      | TAATATTAGG | AGCACCAGAT | ATAGCATTTG  | CTCGTATAAA | TAATATAAGA | TTTTGATTAT  |
| <i>C. collaris</i> (BK8)      | TAATATTAGG | AGCACCAGAT | ATAGCATTTG  | CTCGTATAAA | TAATATAAGA | TTTTGATTAT  |
| <i>C. collaris</i> (BK9)      | TAATATTAGG | AGCACCAGAT | ATAGCATTTG  | CTCGTATAAA | TAATATAAGA | TTTTGATTAT  |
| <i>C. pannonicus</i> (BK25)   | TAATATTAGG | AGCACCAGAT | ATAGCATTTG  | CTCGTATAAA | TAATATAAGA | TTTTGATTAT  |
| <i>C. pannonicus</i> (BK26)   | TAATATTAGG | AGCACCAGAT | ATAGCATTTG  | CTCGTATAAA | TAATATAAGA | TTTTGATTAT  |
| <i>C. brevigena</i> (BK28)    | TAATATTAGG | AGCACCAGAT | ATAGCATTTG  | CTCGTATAAA | TAATATAAGA | TTTTGATTAT  |
| <i>C. brevigena</i> (BK23)    | TAATATTAGG | AGCACCAGAT | ATAGCATTTG  | CTCGTATAAA | TAATATAAGA | TTTTGATTAT  |
| <i>C. brevigena</i> (BK29)    | TAATATTAGG | AGCACCAGAT | ATAGCATTTG  | CTCGTATAAA | TAATATAAGA | TTTTGATTAT  |
| <i>C. brevigena</i> (BK30)    | TAATATTAGG | AGCACCAGAT | ATAGCATTTG  | CTCGTATAAA | TAATATAAGA | TTTTGATTAT  |
| <i>C. brevigena</i> CY (BK37) | TAATATTAGG | AGCACCAGAT | ATAGCATTTG  | CTCGTATAAA | TAATATAAGA | TTTTGATTAT  |
| <i>C. brevigena</i> TU (BK38) | TAATATTAGG | AGCACCAGAT | ATAGCATTTG  | CTCGTATAAA | TAATATAAGA | TTTTGATTAT  |
| <i>C. creticus</i> (7348)     | TAATATTAGG | AGCACCAGAT | ATAGCATTTG  | CTCGTATAAA | TAATATAAGA | TTTTGATTAT  |

|                               |             |            |            |            |            |            |
|-------------------------------|-------------|------------|------------|------------|------------|------------|
|                               | 250         | 260        | 270        | 280        | 290        | 300        |
| <i>C. hederæ</i> (P3)         | TACCTCCTTC  | ATTATTTTAA | TTATTAATAA | GAAGAATTTT | ATATTCAGGT | AGAGGAACTG |
| <i>C. hederæ</i> (BK1)        |             |            |            |            |            |            |
| <i>C. hederæ</i> (BK2)        |             |            |            |            |            |            |
| <i>C. succinctus</i> (BK3)    |             | R          |            |            |            |            |
| <i>C. succinctus</i> (BK4)    |             |            |            |            |            |            |
| <i>C. succinctus</i> (BK5)    |             |            |            |            |            |            |
| <i>C. succinctus</i> (7346)   |             |            |            |            |            |            |
| <i>C. succinctus</i> (7345)   |             |            | G          |            |            |            |
| <i>C. collaris</i> (BK6)      | A           | A          | G          |            | A          | T          |
| <i>C. collaris</i> (BK7)      | A           | A          | G          |            | A          | T          |
| <i>C. collaris</i> (BK8)      | A           | A          | G          |            | A          | T          |
| <i>C. collaris</i> (BK9)      | A           | A          | G          |            | A          | T          |
| <i>C. pannonicus</i> (BK25)   |             |            |            |            |            |            |
| <i>C. pannonicus</i> (BK26)   |             |            |            |            |            |            |
| <i>C. brevigena</i> (BK28)    |             |            |            |            |            |            |
| <i>C. brevigena</i> (BK23)    |             |            |            |            |            |            |
| <i>C. brevigena</i> (BK29)    | G           |            |            |            |            |            |
| <i>C. brevigena</i> (BK30)    |             |            |            |            |            |            |
| <i>C. brevigena</i> CY (BK37) |             |            |            |            |            |            |
| <i>C. brevigena</i> TU (BK38) |             |            |            |            |            |            |
| <i>C. creticus</i> (7348)     | T           | A          | C          | G          | T          |            |
|                               |             |            |            |            |            |            |
|                               | 310         | 320        | 330        | 340        | 350        | 360        |
| <i>C. hederæ</i> (P3)         | GATGGACTAT  | TTATCCTCCT | TTATCTTCAT | TAATATATCA | TCCTTCATTA | TCTGTTGATT |
| <i>C. hederæ</i> (BK1)        |             |            |            |            |            |            |
| <i>C. hederæ</i> (BK2)        | A           |            |            |            |            |            |
| <i>C. succinctus</i> (BK3)    | A           |            |            |            |            |            |
| <i>C. succinctus</i> (BK4)    | A           |            |            |            |            |            |
| <i>C. succinctus</i> (BK5)    | A           |            |            |            |            |            |
| <i>C. succinctus</i> (7346)   |             | A          |            |            |            |            |
| <i>C. succinctus</i> (7345)   |             |            |            |            |            |            |
| <i>C. collaris</i> (BK6)      | A           | AG         | A          |            |            |            |
| <i>C. collaris</i> (BK7)      | A           | AG         | A          |            |            |            |
| <i>C. collaris</i> (BK8)      | A           | AG         | A          |            |            |            |
| <i>C. collaris</i> (BK9)      | A           | AG         | A          |            |            |            |
| <i>C. pannonicus</i> (BK25)   | A           |            |            |            |            |            |
| <i>C. pannonicus</i> (BK26)   | A           |            |            |            |            |            |
| <i>C. brevigena</i> (BK28)    |             |            |            |            |            |            |
| <i>C. brevigena</i> (BK23)    |             |            |            |            |            |            |
| <i>C. brevigena</i> (BK29)    | A           |            |            |            |            |            |
| <i>C. brevigena</i> (BK30)    |             |            |            |            |            |            |
| <i>C. brevigena</i> CY (BK37) |             |            |            |            |            |            |
| <i>C. brevigena</i> TU (BK38) | A           |            |            |            |            |            |
| <i>C. creticus</i> (7348)     | A           | G          | A          | T          | G          | T          |
|                               |             |            |            |            |            |            |
|                               | 370         | 380        | 390        | 400        | 410        | 420        |
| <i>C. hederæ</i> (P3)         | TAACAATTTT  | TTCTTTACAT | ATTGCAGGTA | TTTCATCAAT | TATAAGATCT | ATAAATTTTA |
| <i>C. hederæ</i> (BK1)        |             |            |            |            |            |            |
| <i>C. hederæ</i> (BK2)        | T           |            |            |            |            |            |
| <i>C. succinctus</i> (BK3)    | T           |            |            |            |            |            |
| <i>C. succinctus</i> (BK4)    | T           |            |            |            |            |            |
| <i>C. succinctus</i> (BK5)    | T           |            |            |            |            |            |
| <i>C. succinctus</i> (7346)   |             |            |            |            |            |            |
| <i>C. succinctus</i> (7345)   |             |            |            |            |            |            |
| <i>C. collaris</i> (BK6)      | T           | C          | T          |            |            |            |
| <i>C. collaris</i> (BK7)      | T           | C          | T          |            |            |            |
| <i>C. collaris</i> (BK8)      | T           | C          | C          |            |            |            |
| <i>C. collaris</i> (BK9)      | T           | C          | C          |            |            |            |
| <i>C. pannonicus</i> (BK25)   |             |            |            |            |            |            |
| <i>C. pannonicus</i> (BK26)   | T           |            |            |            |            |            |
| <i>C. brevigena</i> (BK28)    |             |            |            |            |            |            |
| <i>C. brevigena</i> (BK23)    | T           |            |            |            |            |            |
| <i>C. brevigena</i> (BK29)    | T           |            |            |            |            |            |
| <i>C. brevigena</i> (BK30)    |             |            |            |            |            |            |
| <i>C. brevigena</i> CY (BK37) |             |            |            |            |            |            |
| <i>C. brevigena</i> TU (BK38) |             |            |            |            |            |            |
| <i>C. creticus</i> (7348)     | T           | A          |            | T          | G          | T          |
|                               |             |            |            |            |            |            |
|                               | 430         | 440        | 450        | 460        | 470        | 480        |
| <i>C. hederæ</i> (P3)         | TTGTAAACAAT | TTTAAATATA | AAAAATTATA | ATTTAAATTA | TGATCAATTA | TCTTTATTTT |
| <i>C. hederæ</i> (BK1)        |             |            | G          |            |            |            |
| <i>C. hederæ</i> (BK2)        |             |            |            |            |            |            |
| <i>C. succinctus</i> (BK3)    |             |            |            |            |            |            |
| <i>C. succinctus</i> (BK4)    |             |            |            |            |            |            |
| <i>C. succinctus</i> (BK5)    |             |            |            |            |            |            |
| <i>C. succinctus</i> (7346)   |             |            |            |            |            |            |
| <i>C. succinctus</i> (7345)   |             |            |            |            |            |            |
| <i>C. collaris</i> (BK6)      |             |            |            |            |            |            |
| <i>C. collaris</i> (BK7)      |             |            |            |            |            |            |
| <i>C. collaris</i> (BK8)      |             |            |            |            |            |            |
| <i>C. collaris</i> (BK9)      |             |            |            |            |            |            |
| <i>C. pannonicus</i> (BK25)   |             |            |            |            |            |            |
| <i>C. pannonicus</i> (BK26)   |             |            |            |            |            |            |
| <i>C. brevigena</i> (BK28)    |             |            |            |            |            |            |
| <i>C. brevigena</i> (BK23)    |             |            |            |            |            |            |
| <i>C. brevigena</i> (BK29)    |             |            |            |            |            |            |
| <i>C. brevigena</i> (BK30)    |             |            |            |            |            |            |
| <i>C. brevigena</i> CY (BK37) |             |            |            |            |            |            |
| <i>C. brevigena</i> TU (BK38) |             |            |            |            |            |            |
| <i>C. creticus</i> (7348)     |             |            |            |            |            | A          |

|                               |            |            |            |            |            |            |
|-------------------------------|------------|------------|------------|------------|------------|------------|
|                               | 490        | 500        | 510        | 520        | 530        | 540        |
| <i>C. hederæ</i> (P3)         | CTTGATCTGT | TTTTATTACA | ACAATTTTAT | TATTATTATC | TTTACCTGTA | TTAGCAGGTG |
| <i>C. hederæ</i> (BK1)        | .....      | .....      | .....      | .....      | .....      | .....      |
| <i>C. hederæ</i> (BK2)        | .....      | .....      | .....      | .....      | .....      | .....      |
| <i>C. succinctus</i> (BK3)    | .....      | .....      | .....      | .....      | .....      | .....      |
| <i>C. succinctus</i> (BK4)    | .....      | .....      | .....      | .....      | .....      | .....      |
| <i>C. succinctus</i> (BK5)    | .....      | .....      | .....      | .....      | .....      | .....      |
| <i>C. succinctus</i> (7346)   | .....      | .....      | .....      | .....      | .....      | .....      |
| <i>C. succinctus</i> (7345)   | .....      | .....      | .....      | .....      | .....      | .....      |
| <i>C. collaris</i> (BK6)      | .....      | .....      | .....      | .....      | .....      | .....      |
| <i>C. collaris</i> (BK7)      | .....      | .....      | .....      | .....      | .....      | .....      |
| <i>C. collaris</i> (BK8)      | .....      | .....      | .....      | .....      | .....      | .....      |
| <i>C. collaris</i> (BK9)      | .....      | .....      | .....      | .....      | .....      | .....      |
| <i>C. pannonicus</i> (BK25)   | .....      | .....      | .....      | .....      | .....      | .....      |
| <i>C. pannonicus</i> (BK26)   | .....      | .....      | .....      | .....      | .....      | .....      |
| <i>C. brevigena</i> (BK28)    | .....      | .....      | .....      | .....      | .....      | .....      |
| <i>C. brevigena</i> (BK23)    | .....      | .....      | .....      | .....      | .....      | .....      |
| <i>C. brevigena</i> (BK29)    | .....      | .....      | .....      | .....      | .....      | .....      |
| <i>C. brevigena</i> (BK30)    | .....      | .....      | .....      | .....      | .....      | .....      |
| <i>C. brevigena</i> CY (BK37) | .....      | .....      | .....      | .....      | .....      | .....      |
| <i>C. brevigena</i> TU (BK38) | .....      | .....      | .....      | .....      | .....      | .....      |
| <i>C. creticus</i> (7348)     | .....      | .....      | .....      | .....      | .....      | .....      |

|                               |            |           |            |            |            |            |
|-------------------------------|------------|-----------|------------|------------|------------|------------|
|                               | 550        | 560       | 570        | 580        | 590        | 600        |
| <i>C. hederæ</i> (P3)         | CAATTACTAT | ATTATTAAC | GATCGTAATT | TAAATACCTC | TTTTTTTGAT | CCTTCTGGAG |
| <i>C. hederæ</i> (BK1)        | .....      | .....     | .....      | .....      | .....      | .....      |
| <i>C. hederæ</i> (BK2)        | .....      | .....     | .....      | .....      | .....      | .....      |
| <i>C. succinctus</i> (BK3)    | .....      | .....     | .....      | .....      | .....      | .....      |
| <i>C. succinctus</i> (BK4)    | .....      | .....     | .....      | .....      | .....      | .....      |
| <i>C. succinctus</i> (BK5)    | .....      | .....     | .....      | .....      | .....      | .....      |
| <i>C. succinctus</i> (7346)   | .....      | .....     | .....      | .....      | .....      | .....      |
| <i>C. succinctus</i> (7345)   | .....      | .....     | .....      | .....      | .....      | .....      |
| <i>C. collaris</i> (BK6)      | .....      | .....     | .....      | .....      | .....      | .....      |
| <i>C. collaris</i> (BK7)      | .....      | .....     | .....      | .....      | .....      | .....      |
| <i>C. collaris</i> (BK8)      | .....      | .....     | .....      | .....      | .....      | .....      |
| <i>C. collaris</i> (BK9)      | .....      | .....     | .....      | .....      | .....      | .....      |
| <i>C. pannonicus</i> (BK25)   | .....      | .....     | .....      | .....      | .....      | .....      |
| <i>C. pannonicus</i> (BK26)   | .....      | .....     | .....      | .....      | .....      | .....      |
| <i>C. brevigena</i> (BK28)    | .....      | .....     | .....      | .....      | .....      | .....      |
| <i>C. brevigena</i> (BK23)    | .....      | .....     | .....      | .....      | .....      | .....      |
| <i>C. brevigena</i> (BK29)    | .....      | .....     | .....      | .....      | .....      | .....      |
| <i>C. brevigena</i> (BK30)    | .....      | .....     | .....      | .....      | .....      | .....      |
| <i>C. brevigena</i> CY (BK37) | .....      | .....     | .....      | .....      | .....      | .....      |
| <i>C. brevigena</i> TU (BK38) | .....      | .....     | .....      | .....      | .....      | .....      |
| <i>C. creticus</i> (7348)     | .....      | .....     | .....      | .....      | .....      | .....      |

|                               |            |            |               |
|-------------------------------|------------|------------|---------------|
|                               | 610        | 620        | 630           |
| <i>C. hederæ</i> (P3)         | GTGGAGATCC | AATTTTATAT | CAACATTTAT TT |
| <i>C. hederæ</i> (BK1)        | .....      | .....      | .....         |
| <i>C. hederæ</i> (BK2)        | .....      | .....      | .....         |
| <i>C. succinctus</i> (BK3)    | .....      | .....      | .....         |
| <i>C. succinctus</i> (BK4)    | .....      | .....      | .....         |
| <i>C. succinctus</i> (BK5)    | .....      | .....      | .....         |
| <i>C. succinctus</i> (7346)   | .....      | .....      | .....         |
| <i>C. succinctus</i> (7345)   | .....      | .....      | .....         |
| <i>C. collaris</i> (BK6)      | .....      | .....      | .....         |
| <i>C. collaris</i> (BK7)      | .....      | .....      | .....         |
| <i>C. collaris</i> (BK8)      | .....      | .....      | .....         |
| <i>C. collaris</i> (BK9)      | .....      | .....      | .....         |
| <i>C. pannonicus</i> (BK25)   | .....      | .....      | .....         |
| <i>C. pannonicus</i> (BK26)   | .....      | .....      | .....         |
| <i>C. brevigena</i> (BK28)    | .....      | .....      | .....         |
| <i>C. brevigena</i> (BK23)    | .....      | .....      | .....         |
| <i>C. brevigena</i> (BK29)    | .....      | .....      | .....         |
| <i>C. brevigena</i> (BK30)    | .....      | .....      | .....         |
| <i>C. brevigena</i> CY (BK37) | .....      | .....      | .....         |
| <i>C. brevigena</i> TU (BK38) | .....      | .....      | .....         |
| <i>C. creticus</i> (7348)     | .....      | .....      | .....         |
